# Supplementary material for: ICG-Fluorescence Imaging for Margin Assessment During Minimally Invasive Colorectal Liver Metastasis Resection
Source: PubMed Central journal article supplement (PMC11031680; doi:10.1001/jamanetworkopen.2024.6548), 2024-04-19
Supplement: jamanetwopen-e246548-s002.pdf [file jamanetwopen-e246548-s002.pdf]

## **Data Sharing Statement**

### **Data**

**Data available:** No
